# Supplementary material for: Considerations about Hypoxic Changes in Neuraxis Tissue Injuries and Recovery
Source: MDPI journal article supplement (doi:10.3390/biomedicines10020481), 2022-02-18
Supplement: s1 [file s1]

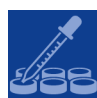

Systematic Review

# Cellular and Molecular Targets for Non-invasive, Non-pharmacological therapeutic/rehabilitative interventions in Acute Ischemic Stroke

**Table S1.** Works selected through a customized (Gelu Onose, 2018) PEDro inspired filtering indirect quality classification.

| No | Article                                                                                                                                                                                                                                                                                                                                                                       | Publication Year | Citation Count | Ref. no | PEDro score |
|----|-------------------------------------------------------------------------------------------------------------------------------------------------------------------------------------------------------------------------------------------------------------------------------------------------------------------------------------------------------------------------------|------------------|----------------|---------|-------------|
| 1  | Claire Thornton, Bryan Leaw, Carina Mallard, Syam Nair, Masako Jinnai, Henrik Hagberg - Cell Death in the Developing Brain after Hypoxia-Ischemia - <i>Front Cell Neurosci.</i> 2017; 11: 248. Published online 2017 Aug 23. doi: 10.3389/fncel.2017.00248 DOI: 10.3389/fncel.2017.00248                                                                                      | 2017             | 34             | (11)    | 10          |
| 2  | Nowak-Sliwinski et al - Consensus guidelines for the use and interpretation of angiogenesis assays - <i>Angiogenesis</i> . Author manuscript; available in PMC 2019 Aug 1. Published in final edited form as: <i>Angiogenesis</i> . 2018 Aug; 21(3): 425–532. doi: 10.1007/s10456-018-9613-x DOI: 10.1007/s10456-018-9613-x.                                                  | 2018             | 119            | (23)    | 10          |
| 3  | Servio H. Ramirez, Allison M. Andrews, Debayon Paul, Joel S. Pachter - Extracellular vesicles: mediators and biomarkers of pathology along CNS barriers - <i>Fluids Barriers CNS</i> . 2018; 15: 19. Published online 2018 Jul 1. doi: 10.1186/s12987-018-0104-7 DOI: 10.1186/s12987-018-0104-7                                                                               | 2018             | 35             | (96)    | 10          |
| 4  | Andrea Becerra-Calixto, Gloria P. Cardona-Gómez - The Role of Astrocytes in Neuroprotection after Brain Stroke: Potential in Cell Therapy - <i>Front Mol Neurosci.</i> 2017; 10: 88. Published online 2017 Apr 3. doi: 10.3389/fnmol.2017.00088 DOI: 10.3389/fnmol.2017.00088                                                                                                 | 2017             | 58             | (61)    | 10          |
| 5  | Markus Islinger, Alfred Voelkl, H. Dariush Fahimi, Michael Schrader - The peroxisome: an update on mysteries 2.0 - <i>Histochem Cell Biol.</i> 2018; 150(5): 443–471. Published online 2018 Sep 15. doi: 10.1007/s00418-018-1722-5 DOI: 10.1007/s00418-018-1722-5                                                                                                             | 2018             | 42             | (62)    | 10          |
| 6  | Gaforio et al. - Virgin Olive Oil and Health: Summary of the III International Conference on Virgin Olive Oil and Health Consensus Report, JAEN (Spain) 2018 - <i>Nutrients</i> . 2019 Sep; 11(9): 2039. Published online 2019 Sep 1. doi: 10.3390/nu11092039 DOI: 10.3390/nu11092039                                                                                         | 2019             | 20             | (132)   | 10          |
| 7  | Cristina Angeloni, Marco Malaguti, Maria Cristina Barbalace, Silvana Hrelia - Bioactivity of Olive Oil Phenols in Neuroprotection - <i>Int J Mol Sci.</i> 2017 Nov; 18(11): 2230. Published online 2017 Oct 25. doi: 10.3390/ijms18112230 DOI: 10.3390/ijms18112230                                                                                                           | 2017             | 47             | (133)   | 10          |
| 8  | Federica Ciregia, Andrea Urbani, Giuseppe Palmisano - Extracellular Vesicles in Brain Tumors and Neurodegenerative Diseases - <i>Front Mol Neurosci.</i> 2017; 10: 276. Published online 2017 Aug 31. doi: 10.3389/fnmol.2017.00276 DOI: 10.3389/fnmol.2017.00276                                                                                                             | 2017             | 37             | (98)    | 10          |
| 9  | Manuela Pennisi, Giuseppe Lanza, Luca Falzone, Francesco Fisicaro, Raffaele Ferri, Rita Bella - SARS-CoV-2 and the Nervous System: From Clinical Features to Molecular Mechanisms - <i>Int J Mol Sci.</i> 2020 Aug; 21(15): 5475. Published online 2020 Jul 31. doi: 10.3390/ijms21155475 DOI: 10.3390/ijms21155475                                                           | 2020             | 27             | (89)    | 10          |
| 10 | Yuan Yang, Lian Liu, Ishan Naik, Zachary Braunstein, Jixin Zhong, Boxu Ren - Transcription Factor C/EBP Homologous Protein in Health and Diseases - <i>Front Immunol.</i> 2017; 8: 1612. Published online 2017 Nov 27. doi: 10.3389/fimmu.2017.01612 DOI: 10.3389/fimmu.2017.01612                                                                                            | 2017             | 40             | (48)    | 10          |
| 11 | Laurensia Yuniati, Blanca Scheijen, Laurens T. van der Meer, Frank N. van Leeuwen - Tumor suppressors BTG1 and BTG2: Beyond growth control - <i>J Cell Physiol.</i> 2019 May; 234(5): 5379–5389. Published online 2018 Oct 23. doi: 10.1002/jcp.27407 DOI: 10.1002/jcp.27407                                                                                                  | 2019             | 28             | (44)    | 10          |
| 12 | Martha Gschwandtner, Rupert Derler, Kim S. Midwood - More Than Just Attractive: How CCL2 Influences Myeloid Cell Behavior Beyond Chemotaxis - <i>Front Immunol.</i> 2019; 10: 2759. Published online 2019 Dec 13. doi: 10.3389/fimmu.2019.02759 DOI: 10.3389/fimmu.2019.02759                                                                                                 | 2019             | 38             | (45)    | 10          |
| 13 | Nunzio Iraci, Tommaso Leonardi, Florian Gessler, Beatriz Vega, Stefano Pluchino - Focus on Extracellular Vesicles: Physiological Role and Signalling Properties of Extracellular Membrane Vesicles - <i>Int J Mol Sci.</i> 2016 Feb; 17(2): 171. Published online 2016 Feb 6. doi: 10.3390/ijms17020171 DOI: 10.3390/ijms17020171                                             | 2016             | 74             | (97)    | 10          |
| 14 | Greenhalgh et al - Peripherally derived macrophages modulate microglial function to reduce inflammation after CNS injury - <i>PLoS Biol.</i> 2018 Oct; 16(10): e2005264. Published online 2018 Oct 17. doi: 10.1371/journal.pbio.2005264 DOI: 10.1371/journal.pbio.2005264                                                                                                    | 2018             | 48             | (57)    | 10          |
| 15 | Cai et al - Panoptic imaging of transparent mice reveals whole-body neuronal projections and skull-meninges connections - <i>Nat Neurosci.</i> Author manuscript; available in PMC 2019 Jun 30. Published in final edited form as: <i>Nat Neurosci.</i> 2019 Feb; 22(2): 317–327. Published online 2018 Dec 31. doi: 10.1038/s41593-018-0301-3 DOI: 10.1038/s41593-018-0301-3 | 2019             | 54             | (14)    | 10          |
| 16 | Magdalena Miranda, Juan Facundo Morici, María Belén Zanoni, Pedro Bekinshtein - Brain-Derived Neurotrophic Factor: A Key Molecule for Memory in the Healthy and the Pathological Brain - <i>Front Cell Neurosci.</i> 2019; 13: 363. Published online 2019 Aug 7. doi: 10.3389/fncel.2019.00363 DOI: 10.3389/fncel.2019.00363                                                  | 2019             | 42             | (113)   | 10          |

|    |                                                                                                                                                                                                                                                                                                                                                                                                                                                                             |      |    |       |    |
|----|-----------------------------------------------------------------------------------------------------------------------------------------------------------------------------------------------------------------------------------------------------------------------------------------------------------------------------------------------------------------------------------------------------------------------------------------------------------------------------|------|----|-------|----|
| 17 | Rashida Ginwala, Raina Bhavsar, De Gaulle I. Chigbu, Pooja Jain, Zafar K. Khan - Potential Role of Flavonoids in Treating Chronic Inflammatory Diseases with a Special Focus on the Anti-Inflammatory Activity of Apigenin - <i>Antioxidants (Basel)</i> 2019 Feb; 8(2): 35. Published online 2019 Feb 5. doi: 10.3390/antiox8020035 DOI: 10.3390/antiox8020035                                                                                                             | 2019 | 24 | (59)  | 10 |
| 18 | Cheryl M. J. Tan, Peregrine Green, Nidi Tapoulal, Adam J. Lewandowski, Paul Leeson, Neil Herring - The Role of Neuropeptide Y in Cardiovascular Health and Disease - <i>Front Physiol.</i> 2018; 9: 1281. Published online 2018 Sep 19. doi: 10.3389/fphys.2018.01281 DOI: 10.3389/fphys.2018.01281                                                                                                                                                                         | 2018 | 23 | (126) | 9  |
| 19 | Emine Şekerdağ, Ihsan Solaroğlu, Yasemin Gürsoy-Özdemir - Cell Death Mechanisms in Stroke and Novel Molecular and Cellular Treatment Options - <i>Curr Neuropharmacol.</i> 2018 Nov; 16(9): 1396–1415. Published online 2018 Nov. doi: 10.2174/1570159X16666180302115544 DOI: 10.2174/1570159X16666180302115544                                                                                                                                                             | 2018 | 23 | (93)  | 9  |
| 20 | Justin Hou Ming Yung, Adria Giacca - Role of c-Jun N-terminal Kinase (JNK) in Obesity and Type 2 Diabetes - <i>Cells.</i> 2020 Mar; 9(3): 706. Published online 2020 Mar 13. doi: 10.3390/cells9030706 DOI: 10.3390/cells9030706                                                                                                                                                                                                                                            | 2020 | 12 | (128) | 9  |
| 21 | Dong Seok Kim, Ho-Il Choi, Yun Wang, Yu Luo, Barry J. Hoffer, Nigel H. Greig - A New Treatment Strategy for Parkinson's Disease through the Gut–Brain Axis: The Glucagon-Like Peptide-1 Receptor Pathway - <i>Cell Transplant.</i> 2017 Sep; 26(9): 1560–1571. Published online 2017 Nov 8. doi: 10.1177/0963689717721234 DOI: 10.1177/0963689717721234                                                                                                                     | 2017 | 29 | (66)  | 9  |
| 22 | Łukasz A. Poniatowski, Piotr Wojdasiewicz, Maciej Krawczyk, Dariusz Szukiewicz, Robert Gasik, Łukasz Kubaszewski, Iwona Kurkowska-Jastrzębska - Analysis of the Role of CX3CL1 (Fractalkine) and Its Receptor CX3CR1 in Traumatic Brain and Spinal Cord Injury: Insight into Recent Advances in Actions of Neurochemokine Agents - <i>Mol Neurobiol.</i> 2017; 54(3): 2167–2188. Published online 2016 Mar 1. doi: 10.1007/s12035-016-9787-4 DOI: 10.1007/s12035-016-9787-4 | 2017 | 25 | (100) | 8  |
| 23 | Jae Young Kim, Jong Youl Kim, Jae Hwan Kim, Hosung Jung, Won Taek Lee, Jong Eun Lee - Restorative Mechanism of Neural Progenitor Cells Overexpressing Arginine Decarboxylase Genes Following Ischemic Injury - <i>Exp Neurobiol.</i> 2019 Feb; 28(1): 85–103. Published online 2019 Jan 21. doi: 10.5607/en.2019.28.1.85 DOI: 10.5607/en.2019.28.1.85                                                                                                                       | 2019 | 16 | (104) | 8  |
| 24 | Zong-Jian Liu, Yuan-Yuan Ran, Shu-Yan Qie, Wei-Jun Gong, Fu-Hai Gao, Zi-Tong Ding, Jia-Ning Xi - Melatonin protects against ischemic stroke by modulating microglia/macrophage polarization toward anti-inflammatory phenotype through STAT3 pathway - <i>CNS Neurosci Ther.</i> 2019 Dec; 25(12): 1353–1362. Published online 2019 Dec 2. doi: 10.1111/cns.13261 DOI: 10.1111/cns.13261                                                                                    | 2019 | 16 | (60)  | 8  |
| 25 | James P. Barrett, Rebecca J. Henry, Sonia Villapol, Bogdan A. Stoica, Alok Kumar, Mark P. Burns, Alan I. Faden, David J. Loane - NOX2 deficiency alters macrophage phenotype through an IL-10/STAT3 dependent mechanism: implications for traumatic brain injury - <i>J Neuroinflammation.</i> 2017; 14: 65. Published online 2017 Mar 24. doi: 10.1186/s12974-017-0843-4 DOI: 10.1186/s12974-017-0843-4                                                                    | 2017 | 26 | (58)  | 8  |
| 26 | Samuel W. Cramer, Clark C. Chen - Photodynamic Therapy for the Treatment of Glioblastoma - <i>Front Surg.</i> 2019; 6: 81. Published online 2020 Jan 21. doi: 10.3389/fsurg.2019.00081 DOI: 10.3389/fsurg.2019.00081                                                                                                                                                                                                                                                        | 2020 | 10 | (140) | 8  |
| 27 | Andrew D. Miller, James F. Zachary - Nervous System - Pathologic Basis of Veterinary Disease. 2017 : 805–907.e1. Published online 2017 Feb 17. doi: 10.1016/B978-0-323-35775-3.00014-X DOI: 10.1016/B978-0-323-35775-3.00014-X                                                                                                                                                                                                                                              | 2017 | 22 | (56)  | 7  |
| 28 | Francisco J. Carvajal, Hayley A. Mattison, Waldo Cerpa - Role of NMDA Receptor-Mediated Glutamatergic Signaling in Chronic and Acute Neuropathologies - <i>Neural Plast.</i> 2016; 2016: 2701526. Published online 2016 Aug 18. doi: 10.1155/2016/2701526 DOI: 10.1155/2016/2701526                                                                                                                                                                                         | 2016 | 27 | (87)  | 7  |
| 29 | Carolina M. Gorgulho, Graziela G. Romagnoli, Rosh Bharthi, Michael T. Lotze - Johnny on the Spot-Chronic Inflammation Is Driven by HMGB1 - <i>Front Immunol.</i> 2019; 10: 1561. Published online 2019 Jul 11. doi: 10.3389/fimmu.2019.01561 DOI: 10.3389/fimmu.2019.01561                                                                                                                                                                                                  | 2019 | 13 | (65)  | 7  |
| 30 | Masaru Tanaka, József Toldi, László Vécsei - Exploring the Etiological Links behind Neurodegenerative Diseases: Inflammatory Cytokines and Bioactive Kynurenines - <i>Int J Mol Sci.</i> 2020 Apr; 21(7): 2431. Published online 2020 Mar 31. doi: 10.3390/ijms21072431 DOI: 10.3390/ijms21072431                                                                                                                                                                           | 2020 | 9  | (92)  | 7  |
| 31 | Alexander A. Ilyasov, Carolanne E. Milligan, Emily P. Pharr, Allyn C. Howlett - The Endocannabinoid System and Oligodendrocytes in Health and Disease - <i>Front Neurosci.</i> 2018; 12: 733. Published online 2018 Oct 26. doi: 10.3389/fnins.2018.00733 DOI: 10.3389/fnins.2018.00733                                                                                                                                                                                     | 2018 | 15 | (136) | 6  |
| 32 | Wensheng Lin, Sarrabeth Stone - Unfolded protein response in myelin disorders - <i>Neural Regen Res.</i> 2020 Apr; 15(4): 636–645. Published online 2019 Oct 18. doi: 10.4103/1673-5374.266903 DOI: 10.4103/1673-5374.266903                                                                                                                                                                                                                                                | 2020 | 8  | (101) | 6  |
| 33 | Li Zhou, Ping Chen, Yating Peng, Ruoyun Ouyang - Role of Oxidative Stress in the Neurocognitive Dysfunction of Obstructive Sleep Apnea Syndrome - <i>Oxid Med Cell Longev.</i> 2016; 2016: 9626831. Published online 2016 Sep 28. doi: 10.1155/2016/9626831 DOI: 10.1155/2016/9626831                                                                                                                                                                                       | 2016 | 22 | (119) | 6  |

|    |                                                                                                                                                                                                                                                                                                                             |      |    |       |   |
|----|-----------------------------------------------------------------------------------------------------------------------------------------------------------------------------------------------------------------------------------------------------------------------------------------------------------------------------|------|----|-------|---|
| 34 | Fahimeh Shahabipour, Nastaran Barati, Thomas P. Johnston, Giuseppe Derosa, Pamela Maffioli, Amirhossein Sahebkar - Exosomes: Nanoparticulate tools for RNA interference and drug delivery - J Cell Physiol. 2017 Jul; 232(7): 1660–1668. Published online 2017 Jan 31. doi: 10.1002/jcp.25766 DOI: 10.1002/jcp.25766        | 2017 | 19 | (90)  | 6 |
| 35 | Ralf Weiskirchen - Hepatoprotective and Anti-fibrotic Agents: It's Time to Take the Next Step - Front Pharmacol. 2015; 6: 303. Published online 2016 Jan 7. doi: 10.3389/fphar.2015.00303 DOI: 10.3389/fphar.2015.00303                                                                                                     | 2016 | 22 | (79)  | 6 |
| 36 | Po-Yuan Ke - Diverse Functions of Autophagy in Liver Physiology and Liver Diseases - Int J Mol Sci. 2019 Jan; 20(2): 300. Published online 2019 Jan 13. doi: 10.3390/ijms20020300 DOI: 10.3390/ijms20020300                                                                                                                 | 2019 | 9  | (121) | 5 |
| 37 | John G. Geisler - 2,4 Dinitrophenol as Medicine - Cells. 2019 Mar; 8(3): 280. Published online 2019 Mar 23. doi: 10.3390/cells8030280 DOI: 10.3390/cells8030280                                                                                                                                                             | 2019 | 10 | (77)  | 5 |
| 38 | Morya et al - Beyond the target area: an integrative view of tDCS-induced motor cortex modulation in patients and athletes - J Neuroeng Rehabil. 2019; 16: 141. Published online 2019 Nov 15. doi: 10.1186/s12984-019-0581-1 DOI: 10.1186/s12984-019-0581-1                                                                 | 2019 | 9  | (94)  | 5 |
| 39 | Omar de Faria, Jr., David G. Gonsalvez, Madeline Nicholson, Junhua Xiao - Activity-dependent central nervous system myelination throughout life - J Neurochem. 2019 Feb; 148(4): 447–461. Published online 2018 Nov 12. doi: 10.1111/jnc.14592 DOI: 10.1111/jnc.14592                                                       | 2019 | 8  | (82)  | 4 |
| 40 | Andrew R. Clark, Michael Ohlmeyer - Protein phosphatase 2A as a therapeutic target in inflammation and neurodegeneration - Pharmacol Ther. 2019 Sep; 201: 181–201. doi: 10.1016/j.pharmthera.2019.05.016 DOI: 10.1016/j.pharmthera.2019.05.016                                                                              | 2019 | 7  | (55)  | 4 |
| 41 | Hyemin Gu, Sang Mi Han, Kwan-Kyu Park - Therapeutic Effects of Apamin as a Bee Venom Component for Non-Neoplastic Disease - Toxins (Basel) 2020 Mar; 12(3): 195. Published online 2020 Mar 19. doi: 10.3390/toxins12030195 DOI: 10.3390/toxins12030195                                                                      | 2020 | 5  | (139) | 4 |
| 42 | Rosaliana Libro, Sabrina Giacoppo, Thangavelu Soundara Rajan, Placido Bramanti, Emanuela Mazzon - Natural Phytochemicals in the Treatment and Prevention of Dementia: An Overview - Molecules. 2016 Apr; 21(4): 518. Published online 2016 Apr 21. doi: 10.3390/molecules21040518 DOI: 10.3390/molecules21040518            | 2016 | 15 | (134) | 4 |
| 43 | Raluca Ioana Teleanu, Cristina Chircov, Alexandru Mihai Grumezescu, Adrian Volceanov, Daniel Mihai Teleanu - Antioxidant Therapies for Neuroprotection—A Review - J Clin Med. 2019 Oct; 8(10): 1659. Published online 2019 Oct 11. doi: 10.3390/jcm8101659 DOI: 10.3390/jcm8101659                                          | 2019 | 7  | (135) | 4 |
| 44 | Landon J. Rohowetz, Jacob G. Kraus, Peter Koulen - Reactive Oxygen Species-Mediated Damage of Retinal Neurons: Drug Development Targets for Therapies of Chronic Neurodegeneration of the Retina - Int J Mol Sci. 2018 Nov; 19(11): 3362. Published online 2018 Oct 27. doi: 10.3390/ijms19113362 DOI: 10.3390/ijms19113362 | 2018 | 11 | (78)  | 4 |
| 45 | Unai Galicia-Garcia, Asier Benito-Vicente, Shifa Jebari, Asier Larrea-Sebal, Haziq Siddiqi, Kepa B. Uribe, Helena Ostolaza, César Martín - Pathophysiology of Type 2 Diabetes Mellitus - Int J Mol Sci. 2020 Sep; 21(17): 6275. Published online 2020 Aug 30. doi: 10.3390/ijms21176275 DOI: 10.3390/ijms21176275           | 2020 | 5  | (88)  | 4 |
